# Supplementary material
Source: PubMed Central journal article supplement (PMC10502697)

## Supplementary Online Content

Gensheimer MF, Gee H, Shirato H, et al. Individualized stereotactic ablative radiotherapy for treating lung tumors: the iSABR phase 2 nonrandomized controlled trial. Published online September 14, 2023. *JAMA Oncol*.

doi:10.1001/jamaoncol.2023.3495

**eTable 1.** Treatment Plan Data, Grouped by Assigned Dose

**eTable 2.** Site of First Recurrence, Patient Level

**eTable 3.** Details of Cases of Equivocal Local Recurrence Reviewed by Panel

**eTable 4.** Local Recurrence by Patient Group (Kaplan-Meier Method)

**eTable 5.** Local Recurrence by Patient Group, First Enrollment Per Patient Only (Kaplan-Meier Method)

**eTable 6.** Treated-Tumor Recurrence By Patient Group (Cumulative Incidence Method)

**eTable 7.** Treated-Tumor Recurrence vs Competing Events by Tumor Size/Location

**eTable 8.** Distant Recurrence by Patient Group

**eTable 9.** Treated Tumor Recurrence by T Stage (Primary NSCLC Only, so Groups 1-2 Only)

**eTable 10.** Treated Tumor Recurrence by Histology (Primary NSCLC Only, so Groups 1-2 Only)

**eFigure 1.** Treated Tumor Recurrence, per Tumor, Kaplan-Meier Plot

**eFigure 2.** Treated Tumor Recurrence by T stage, per Tumor (Primary NSCLC Only, so Groups 1-2 Only)

**eFigure 3.** Treated Tumor Recurrence By Histology, per Tumor (Primary NSCLC Only, so Groups 1-2 Only)

**eFigure 4.** Treated Tumor Recurrence by Primary Tumor Site, per Tumor (All Patients)

**eFigure 5.** Cumulative Incidence of Regional Recurrence, per Patient (Primary NSCLC Only, so Groups 1-2 Only)

**eFigure 6.** Cumulative Incidence of Distant Recurrence, per Patient

**eFigure 7.** Recurrence-Free Survival, per Patient

**eFigure 8.** Patient With Possible Grade 5 Toxicity

This supplementary material has been provided by the authors to give readers additional information about their work.

**eTable 1.** Treatment plan data, grouped by assigned dose. Data are expressed as: median (25<sup>th</sup> percentile, 75<sup>th</sup> percentile).

| Parameter                     | All dose levels (n=285) | 25 Gy in 1 fraction (n=159) | 40 Gy in 4 fractions (n=34) | 50 Gy in 4 fractions (n=73) | 54 Gy in 3 fractions (n=11) | 60 Gy in 8 fractions (n=8) |
|-------------------------------|-------------------------|-----------------------------|-----------------------------|-----------------------------|-----------------------------|----------------------------|
| GTV volume (cm <sup>3</sup> ) | 3.6 (1.2,10.2)          | 1.8 (0.9,5.0)               | 3.2 (2.5,5.5)               | 13.5 (6.2,22.1)             | 42.0 (34.4,50.1)            | 45.6 (37.0,62.7)           |
| Maximum dose                  | 130% (126,136)          | 130% (126,136)              | 129% (125,135)              | 130% (125,135)              | 138% (130,144)              | 134% (128,141)             |
| PTV D95%                      | 100% (100,100)          | 100% (100,100)              | 100% (100,100)              | 100% (100,100)              | 100% (99.1,100)             | 100% (100,100.03)          |
| PTV V90%                      | 100% (99.98,100)        | 100% (99.99,100)            | 100% (100,100)              | 100% (99.97,100)            | 100% (99.85,100)            | 100% (99.7,100)            |
| PTV V95%                      | 99.7% (99.4,99.9)       | 99.7% (99.4,99.9)           | 99.8% (99.7,99.9)           | 99.8% (99.4,99.9)           | 99.3% (98.5,99.8)           | 99.3% (98.8,99.5)          |
| GTV mean dose                 | 121% (118,126)          | 122% (118,126)              | 119% (117,125)              | 120% (117,125)              | 120% (118,126)              | 120% (118,123)             |
| Conformity index              | 1.04 (1.00,1.11)        | 1.06 (1.02,1.13)            | 1.04 (1.02,1.11)            | 1.02 (1.11,1.06)            | 0.99 (0.96,1.02)            | 1.01 (0.99,1.03)           |

**eTable 2.** Site of first recurrence, patient level

| Group              | Whole study cohort (n=217) | Group 1: first primary NSCLC (n=79) | Group 2: new primary or synchronous NSCLC (n=67) | Group 3: lung metastases (n=71) |
|--------------------|----------------------------|-------------------------------------|--------------------------------------------------|---------------------------------|
| Local              | 12 (5.5%)                  | 6 (7.6%)                            | 2 (3.0%)                                         | 4 (5.6%)                        |
| Regional           | 18 (8.3%)                  | 10 (12.7%)                          | 7 (10.5%)                                        | 1 (1.4%)                        |
| Distant            | 67 (30.9%)                 | 10 (12.7%)                          | 20 (29.9%)                                       | 37 (52.1%)                      |
| Local and regional | 5 (2.3%)                   | 2 (2.5%)                            | 2 (3.0%)                                         | 1 (1.4%)                        |
| Local & distant    | 2 (0.9%)                   | 2 (2.5%)                            | 0 (0%)                                           | 0 (0%)                          |
| Regional & distant | 10 (4.6%)                  | 1 (1.3%)                            | 4 (6.0%)                                         | 5 (7.0%)                        |
| None               | 103 (47.5%)                | 48 (60.8%)                          | 32 (47.8%)                                       | 23 (32.4%)                      |

**eTable 3.** Details of cases of equivocal local recurrence reviewed by panel.

| Patient group | Num. lesions treated | Possible recurrence time point | Details                                                                                                                     | Final determination |
|---------------|----------------------|--------------------------------|-----------------------------------------------------------------------------------------------------------------------------|---------------------|
| 1             | 1                    | 4 years                        | CT suggestive of local recurrence, and new vocal cord paralysis consistent with tumor location                              | Local recurrence    |
| 1             | 1                    | 15 months                      | CT and PET with nodular changes and a satellite nodule                                                                      | Local recurrence    |
| 1             | 1                    | 2.5 years                      | CT and PET showed serial growth of mass, biopsy showed atypical cells, received reirradiation                               | Local recurrence    |
| 1             | 1                    | 21 months                      | Intrapulmonary nodal recurrence outside radiation field                                                                     | Regional recurrence |
| 1             | 1                    | 3 years                        | Nodules appeared around the treated area, but were stable over several scans consistent with post-radiation changes         | No recurrence       |
| 2             | 2                    | 7 years                        | Marginal recurrence, convincing on imaging. Patient received SABR for the recurrence.                                       | Local recurrence    |
| 2             | 2                    | 9 months                       | CT showed growth of treated tumor PET confirmed and tumor was also hypermetabolic. Patient received SABR for the recurrence | Local recurrence    |
| 2             | 2                    | 2 years                        | New nodule in lobe far from treated tumor, with concurrent distant recurrence                                               | Distant recurrence  |
| 2             | 1                    | 15 months                      | New nodule in same lobe far from treated tumor, without other new lesions                                                   | New primary         |
| 2             | 2                    | 15 months                      | Treated tumor was in left lower lobe; developed new nodules along major fissure and adjacent to it in left lower lobe       | Distant recurrence  |

|   |   |           |                                                                                                                             |                                 |
|---|---|-----------|-----------------------------------------------------------------------------------------------------------------------------|---------------------------------|
| 2 | 1 | 3 years   | New nodule in same lobe with appearance of primary adenocarcinoma. Patient with history of many lung adenocarcinomas.       | New primary                     |
| 2 | 2 | 18 months | Recurrence in adrenal gland and multiple out of field nodules in treated lobe                                               | Distant recurrence              |
| 2 | 1 | 6 months  | Recurrence in bone metastasis, hilar node, and multiple out of field nodules in treated lobe and other lobes                | Regional and distant recurrence |
| 2 | 1 | 18 months | Radiographic changes in same lobe (in and out of field) concerning for aspergillus infection, asymptomatic, awaiting biopsy | No recurrence                   |
| 3 | 1 | 1 year    | Innumerable new lung lesions in all lobes                                                                                   | Distant recurrence              |
| 3 | 1 | 1 year    | Widespread new lung lesions in all lobes                                                                                    | Distant recurrence              |
| 3 | 1 | 6 months  | Recurrence in pleural-based lesions including in same lobe                                                                  | Distant recurrence              |

**eTable 4.** Local recurrence by patient group (Kaplan-Meier method)

|         | 1 year         | 2 years         | 5 years          |
|---------|----------------|-----------------|------------------|
| Group 1 | 2.6% (0.7-7.1) | 9.6% (4.9-16.2) | 16.6% (9.2-25.9) |
| Group 2 | 5.2% (2.3-9.9) | 7.4% (3.8-12.7) | 7.4% (3.8-12.7)  |
| Group 3 | 3.0% (1.0-6.7) | 4.9% (2.2-9.4)  | 9.3% (4.8-15.6)  |

90% confidence intervals in parentheses

**eTable 5.** Local recurrence by patient group, first enrollment per patient only (Kaplan-Meier method). 258 of 285 total tumors were included in this analysis.

|         | 1 year          | 2 years          | 5 years           |
|---------|-----------------|------------------|-------------------|
| Group 1 | 3.1% (0.0-6.7)  | 12.2% (5.1-19.3) | 24.1% (11.5-36.7) |
| Group 2 | 7.6% (2.2-13.0) | 9.7% (3.4-16.0)  | 9.7% (3.4-16.0)   |
| Group 3 | 3.7 (0.0-8.0)   | 8.6% (1.7-15.5)  | 23.6% (8.6-38.6)  |

90% confidence intervals in parentheses

**eTable 6.** Treated tumor recurrence by patient group (cumulative incidence method)

|         | 1 year         | 2 years         | 5 years          |
|---------|----------------|-----------------|------------------|
| Group 1 | 2.6% (0.5-8.2) | 7.9% (3.2-15.4) | 11.6% (5.2-20.6) |
| Group 2 | 4.1% (1.3-9.5) | 5.2% (1.9-11.0) | 5.2% (1.9-11.0)  |
| Group 3 | 2.9% (0.8-7.7) | 2.9% (0.8-7.7)  | 5.3% (1.9-11.3)  |

95% confidence intervals in parentheses

**eTable 7.** Treated tumor recurrence vs. competing events by tumor size/location. Differences were not statistically significant ( $P = 0.21$ ).

|                          | Tumors | Treated tumor recurrence | Competing event (death or distant recurrence prior to treated tumor recurrence) | Censored |
|--------------------------|--------|--------------------------|---------------------------------------------------------------------------------|----------|
| ≤10cc peripheral         | 169    | 11                       | 94                                                                              | 64       |
| ≤10cc central            | 41     | 1                        | 21                                                                              | 19       |
| >10 and ≤30cc peripheral | 31     | 5                        | 15                                                                              | 11       |
| >10 and ≤30cc central    | 25     | 2                        | 18                                                                              | 5        |
| >30cc peripheral         | 11     | 0                        | 9                                                                               | 2        |
| >30cc central            | 8      | 1                        | 4                                                                               | 3        |

**eTable 8.** Distant recurrence by patient group

|         | 1 year            | 2 years           | 5 years           |
|---------|-------------------|-------------------|-------------------|
| Group 1 | 10.3% (4.8-18.2)  | 15.7% (8.6-24.8)  | 23.2% (13.7-34.3) |
| Group 2 | 16.9% (9.0-27.0)  | 28.7% (18.0-40.3) | 53.6% (32.0-71.1) |
| Group 3 | 45.7% (33.6-56.9) | 54.4% (41.9-65.4) | 61.8% (47.1-73.5) |

95% confidence intervals in parentheses

**eTable 9.** Treated tumor recurrence by T stage (primary NSCLC only, so groups 1-2 only).

|            | 1 year          | 2 years         | 5 years         |
|------------|-----------------|-----------------|-----------------|
| T1 (n=145) | 3.6% (1.4-7.8)  | 5.9% (2.8-10.8) | 8.2% (5-20.3)   |
| T2 (n=37)  | 2.7% (0.2-12.3) | 8.1% (3.2-38.5) | 8.1% (3.2-38.5) |

95% confidence intervals in parentheses

**eTable 10.** Treated tumor recurrence by histology (primary NSCLC only, so groups 1-2 only).

|                                | 1 year          | 2 years          | 5 years          |
|--------------------------------|-----------------|------------------|------------------|
| Adenocarcinoma (n=105)         | 2.7% (0.7-7.0)  | 6.3% (2.8-11.8)  | 6.3% (2.8-11.8)  |
| Squamous cell carcinoma (n=28) | 9.7% (2.4-23.2) | 12.9% (4.0-27.3) | 23.3% (8.2-42.8) |
| Other/unknown (n=28)           | 0% (0-0)        | 0% (0-0)         | 0% (0-0)         |

95% confidence intervals in parentheses

### Supplementary Figures

**eFigure 1.** Treated tumor recurrence, per tumor, Kaplan-Meier plot. Censored at time of death, distant recurrence, or loss to follow-up. This figure allows comparison of our results to other studies that used Kaplan-Meier method instead of competing risks approach. First NSCLC (group 1), New/multiple NSCLC (group 2), Lung metastases (group 3)

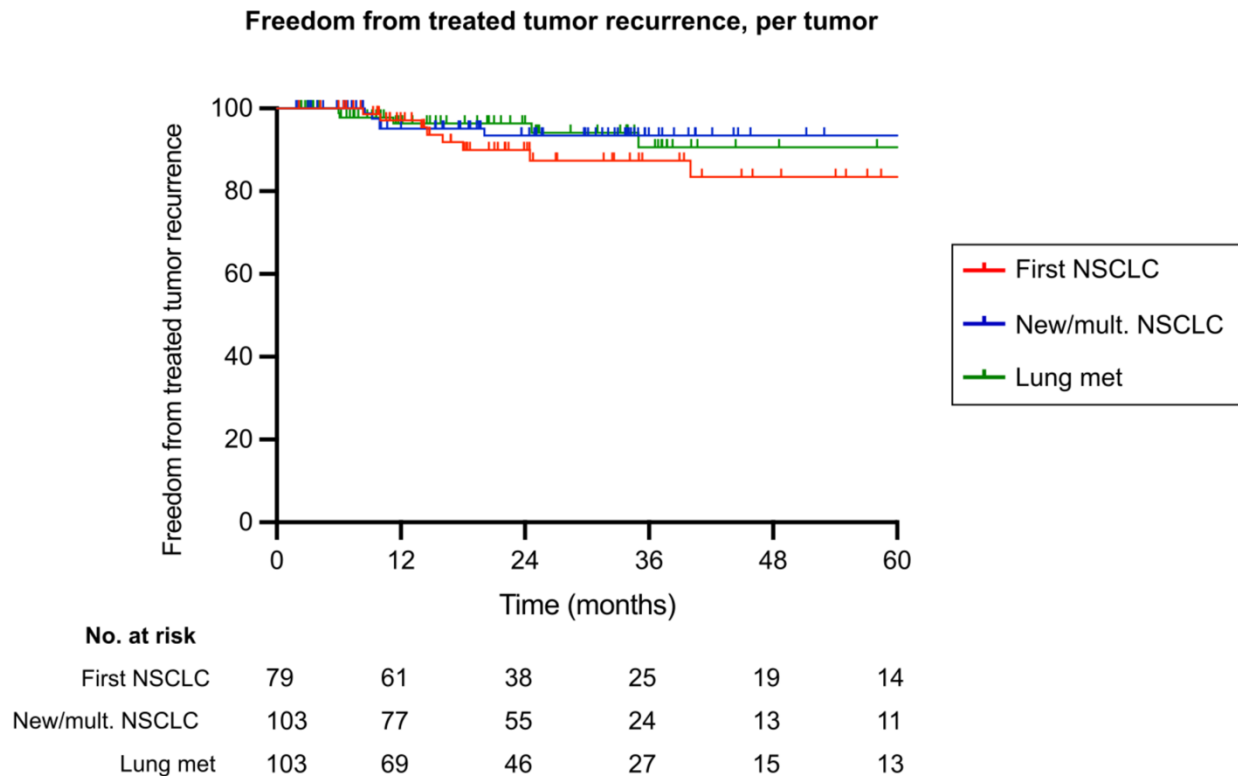

**eFigure 2.** Treated tumor recurrence by T stage, per tumor (primary NSCLC only, so groups 1-2 only). Competing events are distant recurrence or death. Treated tumor recurrence was similar between T1 and T2 (P = 0.52).

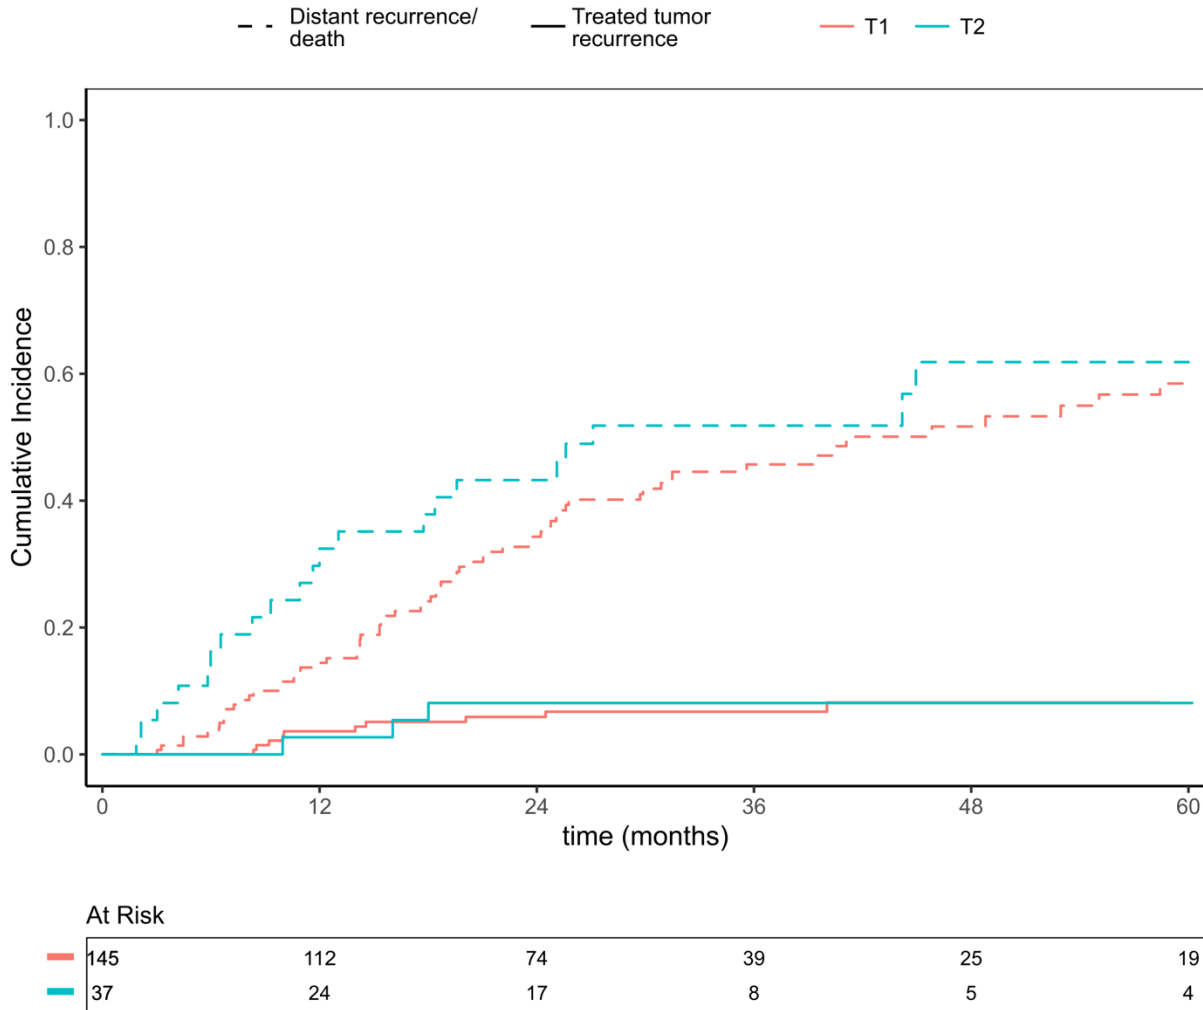

**eFigure 3.** Treated tumor recurrence by histology, per tumor (primary NSCLC only, so groups 1-2 only). Competing events are distant recurrence or death. Treated tumor recurrence was greater in SCC (P = 0.03).

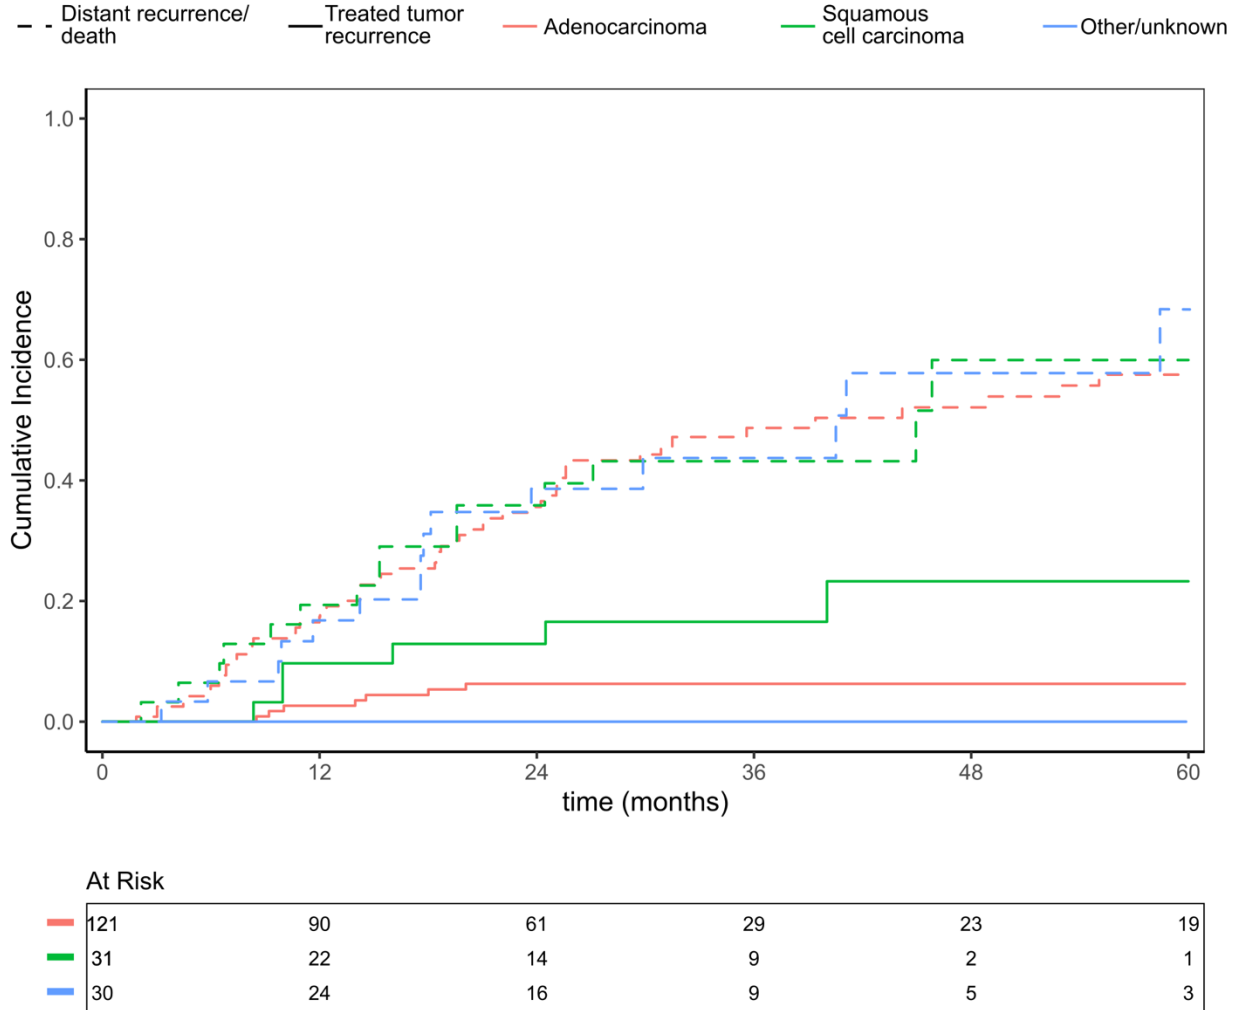



**eFigure 4.** Treated tumor recurrence by primary tumor site, per tumor (all patients). Competing events are distant recurrence or death.

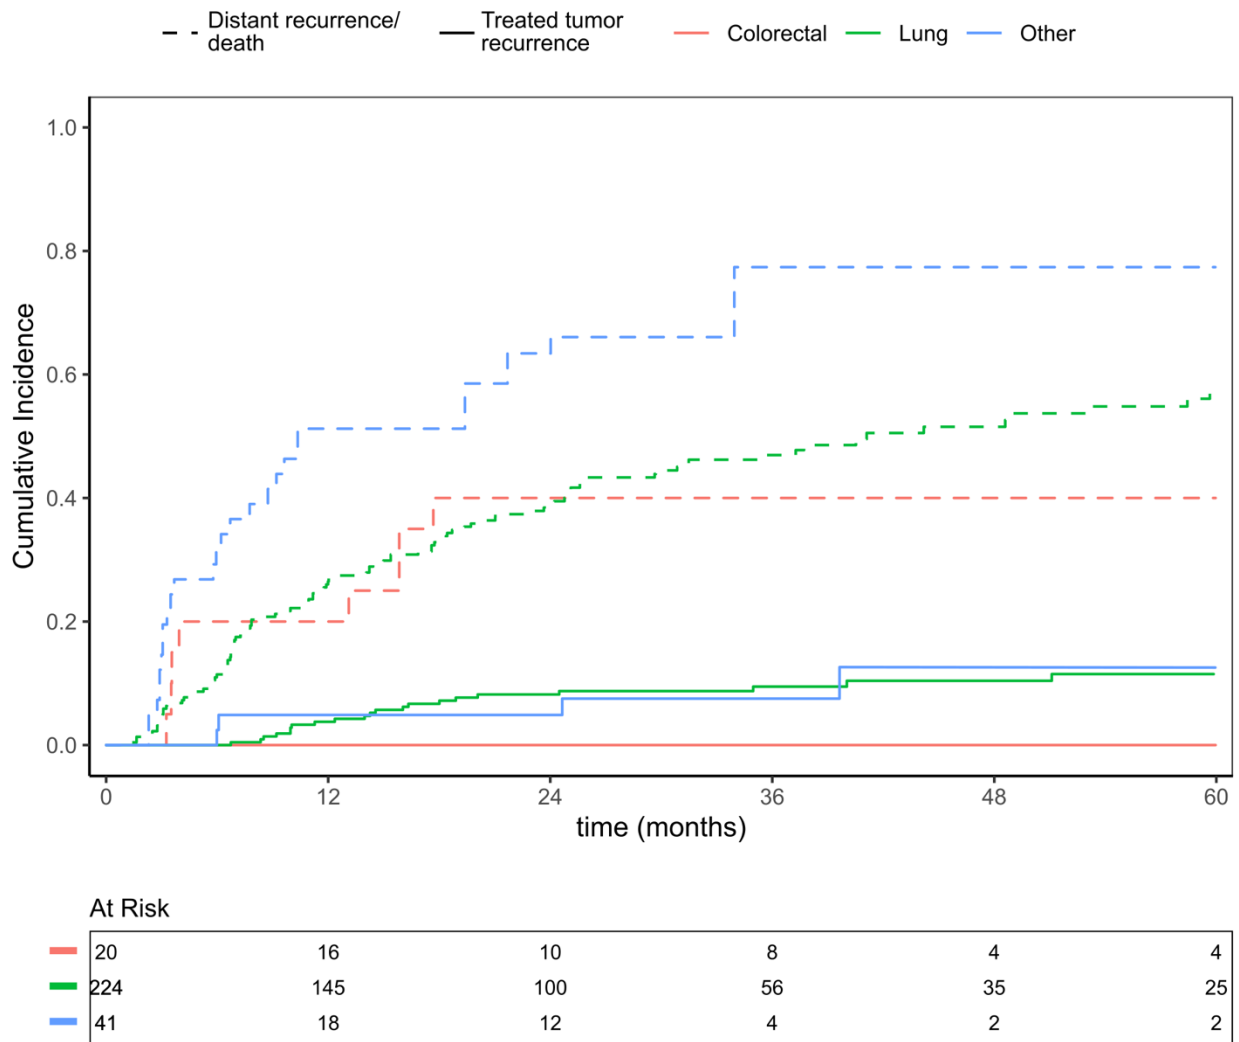

**eFigure 5.** Cumulative incidence of regional recurrence, per patient (Primary NSCLC Only, so Groups 1-2 Only). First NSCLC (group 1), New/multiple NSCLC (group 2)

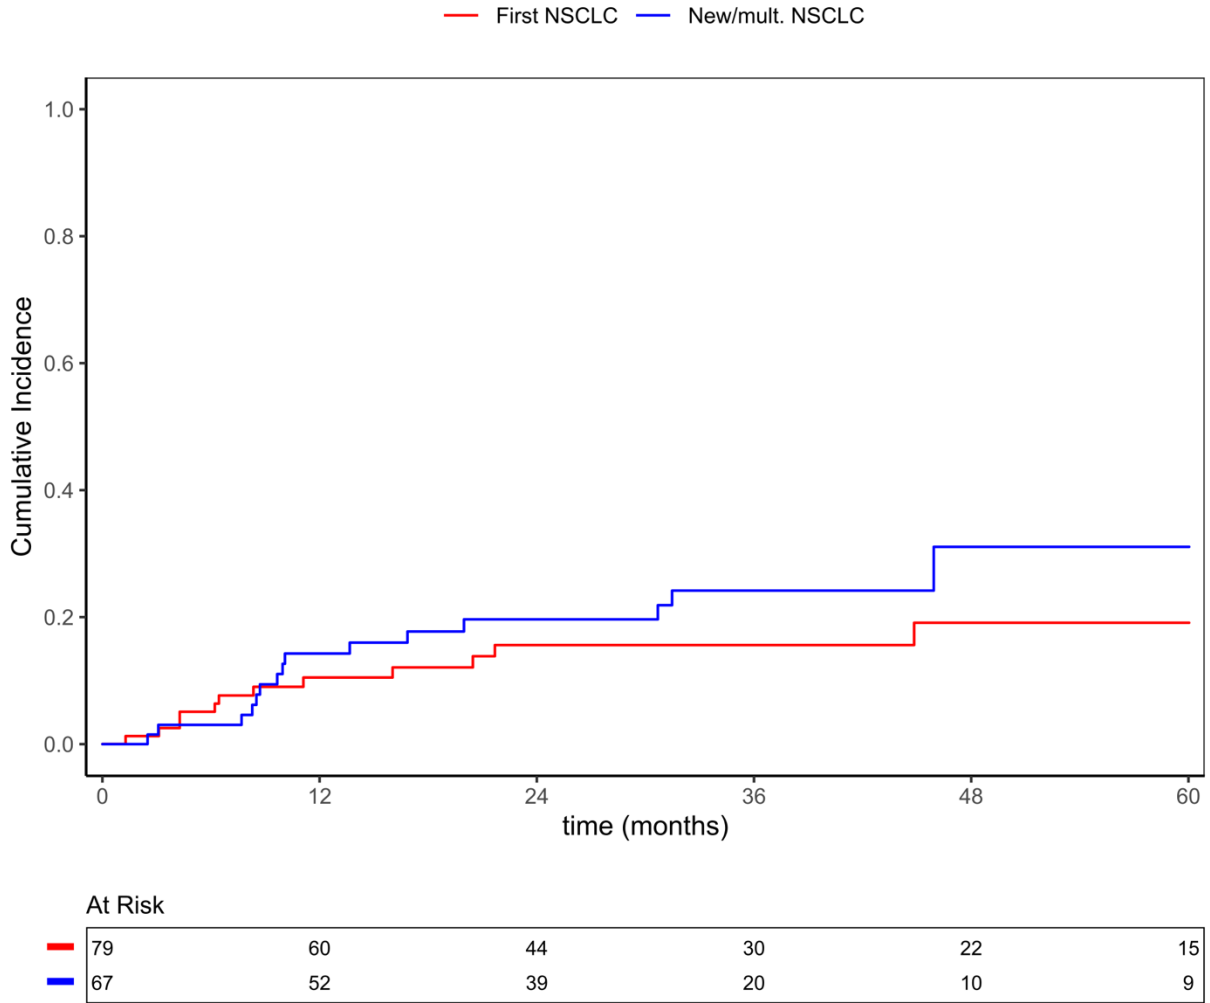

**eFigure 6.** Cumulative incidence of distant recurrence, per patient. First NSCLC (group 1), New/multiple NSCLC (group 2), Lung metastases (group 3)

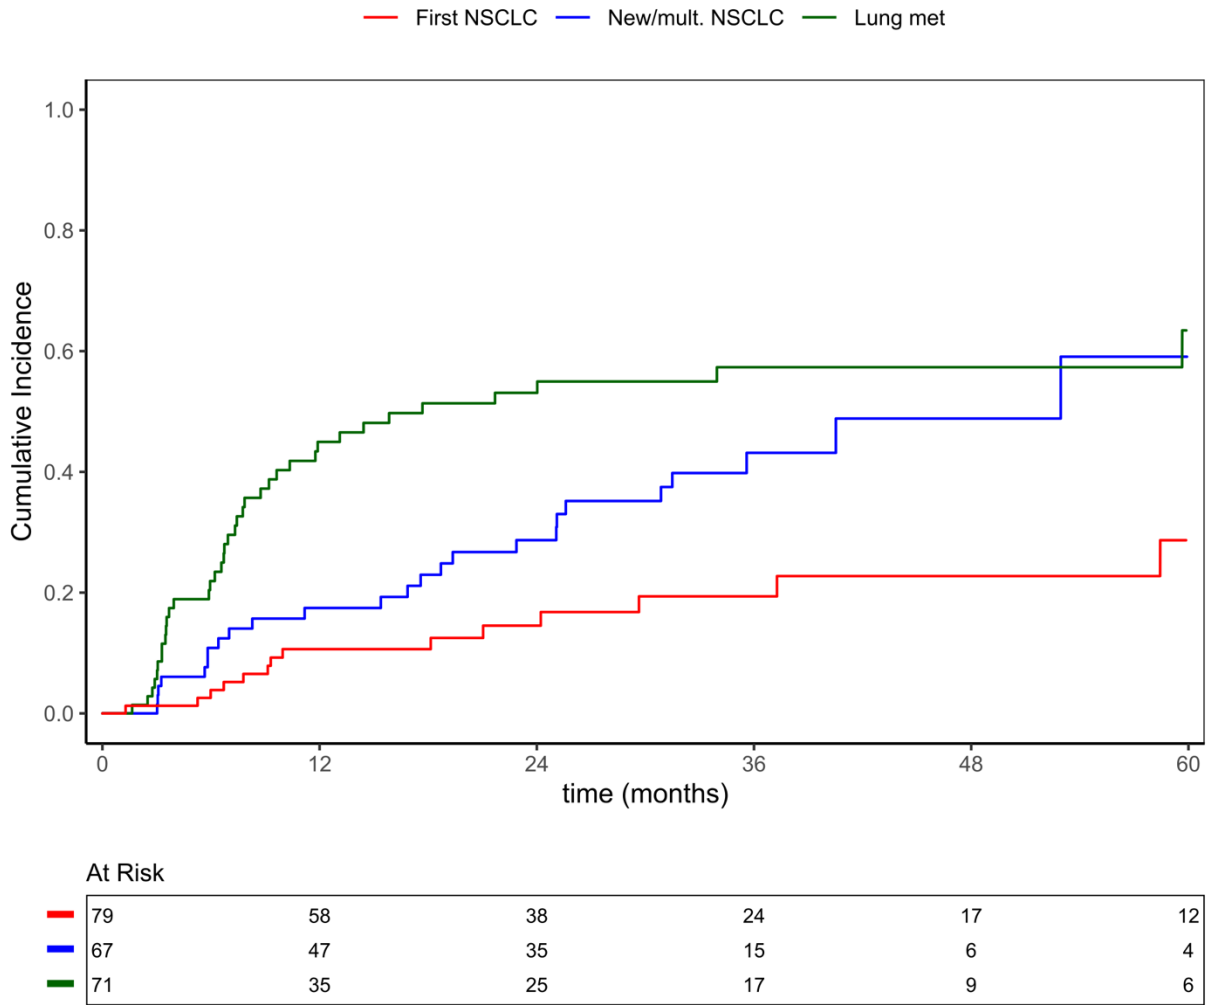

**eFigure 7.** Recurrence-free survival, per patient. First NSCLC (group 1), New/multiple NSCLC (group 2), Lung metastases (group 3)

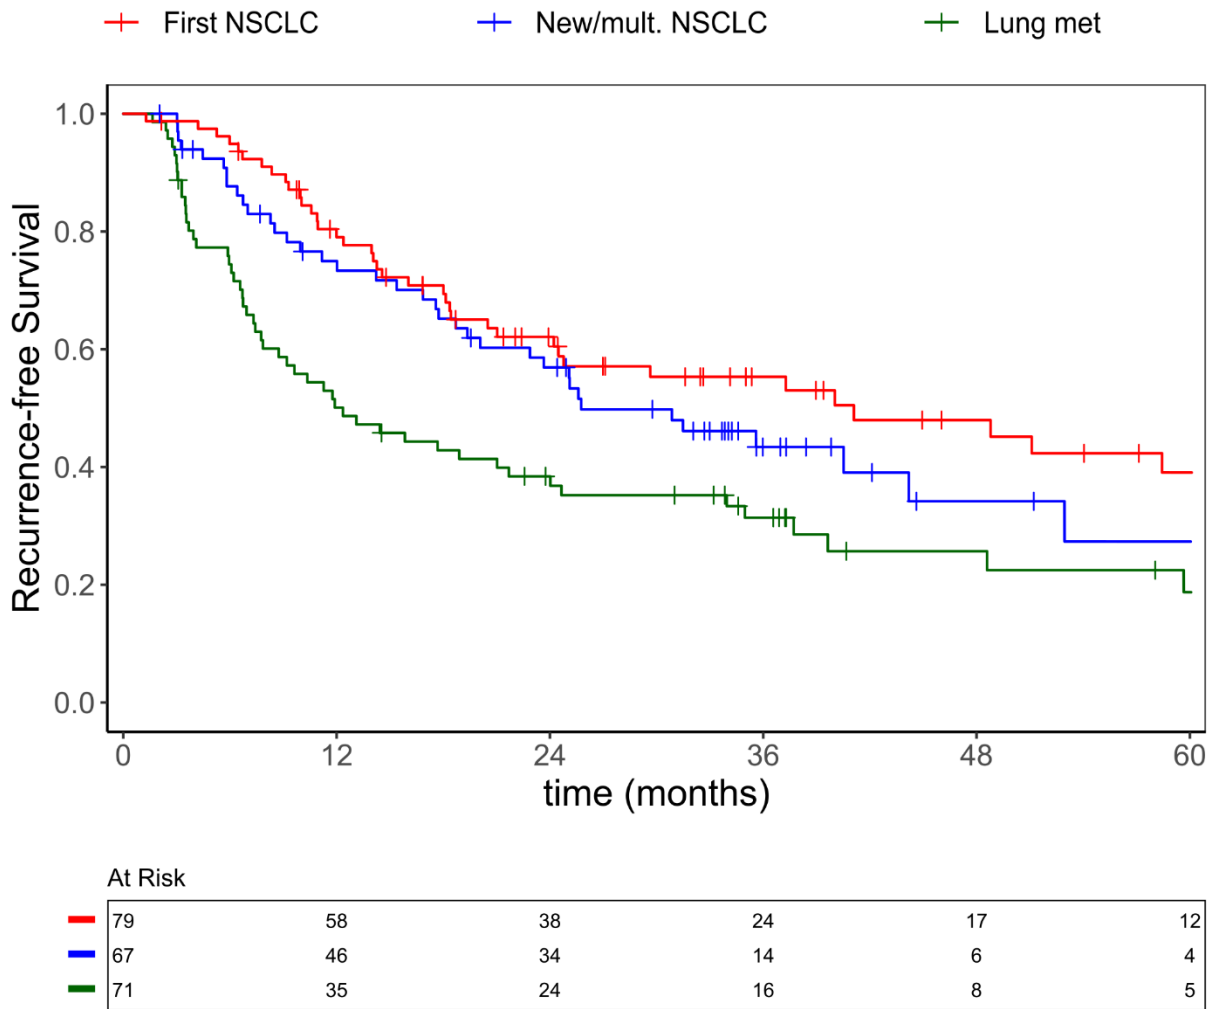

**eFigure 8.** Patient with large ultra-central tumor and possibly treatment related grade 5 toxicity. Dose was 60 Gy in 8 fractions. Maximum dose to the proximal bronchial tree was 67.9 Gy. GTV=gross tumor volume (red contour). IDL=isodose line (orange, green, cyan contours).

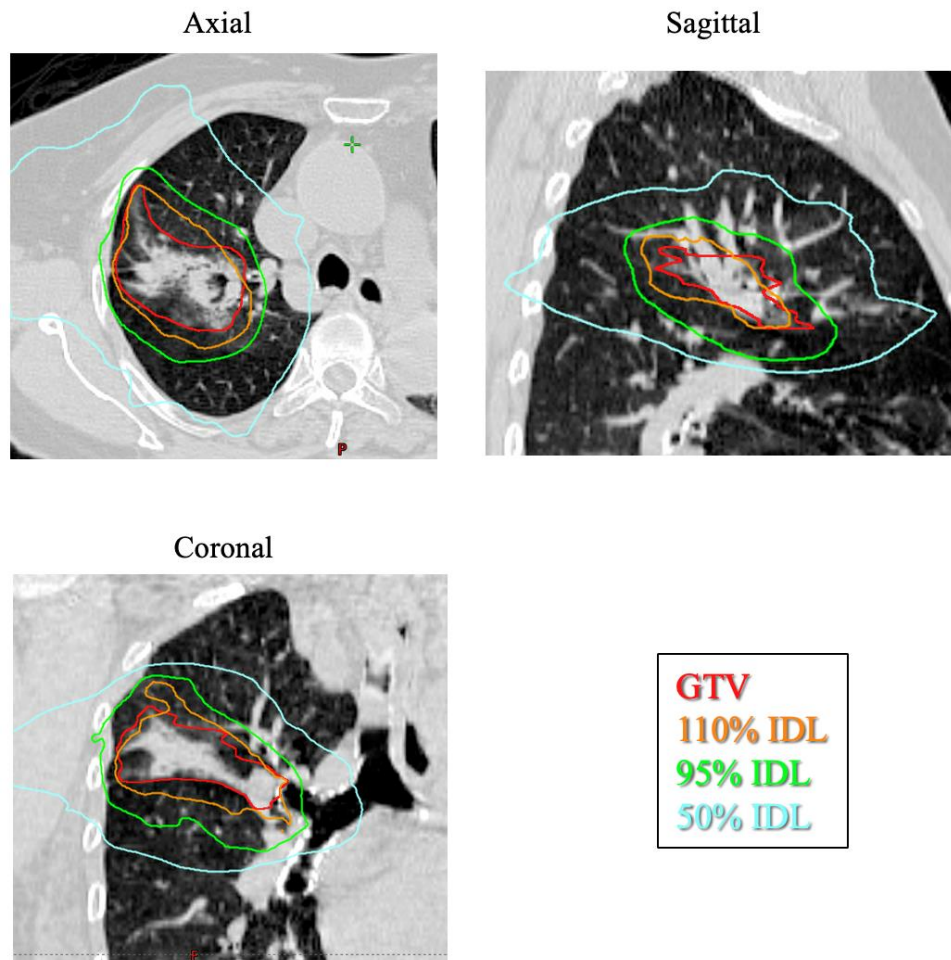

Supplement: jamaoncol-e233495-s002.pdf [file jamaoncol-e233495-s002.pdf]
