# Supplementary material
Source: PubMed Central journal article supplement (PMC10502697)
Supplement: jamaoncol-e233495-s003.pdf [file jamaoncol-e233495-s003.pdf]

## Data Sharing Statement

Gensheimer. Individualized Stereotactic Ablative Radiotherapy for Lung Tumors. *JAMA Oncol.*  
Published September 14, 2023. doi:10.1001/jamaoncol.2023.3495

### Data

**Data available:** No
